# Supplementary material for: A cyclodiphosphazane based pincer ligand, [2,6-{μ-(tBuN)2P(tBuHN)PO}2C6H3I]: NiII, PdII, PtII and CuI complexes and catalytic studies
Source: Royal Society of Chemistry journal article supplement (doi:10.1039/c4dt02810d), 2015-01-01
Supplement: c4dt02810d1.pdf [file c4dt02810d1.pdf]

## Supporting Information

### **Cyclodiphosphazane based pincer ligand, 2,6- $\{\mu\text{-}(\text{tBuN})\text{P}(\text{tBuHN})\text{PO}\}_2\text{C}_6\text{H}_3$ : **Ni<sup>II</sup>, Pd<sup>II</sup>, Pt<sup>II</sup> and Cu<sup>I</sup> complexes, and catalytic studies****

Guddekoppa S. Ananthnag<sup>a</sup>, Joel T. Mague<sup>b</sup> and Maravanji S. Balakrishna<sup>\*,a</sup>

<sup>a</sup>*Phosphorus Laboratory, Department of Chemistry, Indian Institute of Technology Bombay, Powai, Mumbai 400 076, India.*

<sup>b</sup>*Department of Chemistry, Tulane University, New Orleans, Louisiana 70118, USA.*

---

|                                                         |      |
|---------------------------------------------------------|------|
| 1. NMR and mass spectral data of compounds <b>a – i</b> | 2-3  |
| 2. Copies of NMR spectra of compounds <b>1 – 6</b>      | 3-6  |
| 3. Copies of NMR spectra of compounds <b>a – i</b>      | 6-10 |
| 4. References                                           | 11   |

---

\* Author to whom correspondence should be addressed. E-mail: [krishna@chem.iitb.ac.in](mailto:krishna@chem.iitb.ac.in),

msb\_krishna@iitb.ac.in (M. S. Balakrishna); Fax: +91-22-5172-3480/2576-7152.

The isolated yields of compounds **a** – **i** are shown in Chart 1 in main text. The  $^{31}\text{P}\{^1\text{H}\}$ ,  $^1\text{H}$  and mass spectral data of all the compounds are given below.

- a. Triphenylphosphine oxide.**<sup>1</sup>  $^{31}\text{P}\{^1\text{H}\}$  (202.5 MHz,  $\text{CDCl}_3$ ):  $\delta$  29.3.  $^1\text{H}$  NMR (500 MHz,  $\text{CDCl}_3$ ):  $\delta$  7.69-7.65 (m, 6H), 7.56 (t,  $J = 7.5$  Hz, 3H), 7.48-7.45 (m, 6H). HRMS (Calcd. for  $\text{M}+\text{H}$   $\text{C}_{18}\text{H}_{16}\text{OP}$ ): 279.0933. Found: 279.0936.
- b. Diphenyl(o-tolyl)phosphine oxide.**<sup>1</sup>  $^{31}\text{P}\{^1\text{H}\}$  (202.5 MHz,  $\text{CDCl}_3$ ):  $\delta$  31.2.  $^1\text{H}$  NMR (500 MHz,  $\text{CDCl}_3$ ):  $\delta$  7.69-7.63 (m, 4H), 7.55 (d,  $J = 7.5$  Hz, 2H), 7.49-7.46 (m, 4H), 7.42 (t,  $J = 7.5$  Hz, 1H), 7.29 (m, 1H), 7.13 (t,  $J = 7.0$  Hz, 1H), 7.02 (m, 1H), 2.45 (s, 3H). HRMS (Calcd. for  $\text{M}+\text{H}$   $\text{C}_{19}\text{H}_{18}\text{OP}$ ): 293.1090. Found: 293.1087.
- c. Diphenyl(p-tolyl)phosphine oxide.**<sup>2</sup>  $^{31}\text{P}\{^1\text{H}\}$  (202.5 MHz,  $\text{CDCl}_3$ ):  $\delta$  29.2.  $^1\text{H}$  NMR (500 MHz,  $\text{CDCl}_3$ ):  $\delta$  7.68-7.64 (m, 4H), 7.57-7.51 (m, 4H), 7.47-7.43 (m, 4H), 7.28-7.27 (m, 2H), 2.40 (s, 3H). HRMS (Calcd. for  $\text{M}+\text{H}$   $\text{C}_{19}\text{H}_{18}\text{OP}$ ): 293.1090. Found: 293.1090.
- d. (3-methoxyphenyl)diphenylphosphine oxide.**<sup>3</sup>  $^{31}\text{P}\{^1\text{H}\}$  (202.5 MHz,  $\text{CDCl}_3$ ):  $\delta$  29.5.  $^1\text{H}$  NMR (500 MHz,  $\text{CDCl}_3$ ):  $\delta$  7.70-7.64 (m, 4H), 7.50-7.29 (m, 8H), 7.19-7.13 (m, 1H), 7.03 (d,  $J = 9$  Hz, 1H), 3.75 (s, 3H). HRMS (Calcd. for  $\text{M}+\text{H}$   $\text{C}_{19}\text{H}_{18}\text{O}_2\text{P}$ ): 309.1039. Found: 309.1038.
- e. (4-methoxyphenyl)diphenylphosphine oxide.**<sup>1</sup>  $^{31}\text{P}\{^1\text{H}\}$  (202.5 MHz,  $\text{CDCl}_3$ ):  $\delta$  29.2.  $^1\text{H}$  NMR (500 MHz,  $\text{CDCl}_3$ ):  $\delta$  7.69-7.64 (m, 4H), 7.60-7.53 (m, 4H), 7.52-7.46 (m, 4H), 6.97-6.96 (m, 2H), 3.84 (s, 3H). HRMS (Calcd. for  $\text{M}+\text{H}$   $\text{C}_{19}\text{H}_{18}\text{O}_2\text{P}$ ): 309.1039. Found: 309.1034.
- f. 4-(diphenylphosphoryl)benzotrile.**<sup>4</sup>  $^{31}\text{P}\{^1\text{H}\}$  (202.5 MHz,  $\text{CDCl}_3$ ):  $\delta$  28.0.  $^1\text{H}$  NMR (500 MHz,  $\text{CDCl}_3$ ):  $\delta$  7.79 (t,  $J = 10.5$  Hz, 2H), 7.73 (d,  $J = 7.5$  Hz, 2H), 7.62 (t,  $J = 10.0$  Hz, 4H),

7.57 (t,  $J = 7.0$  Hz, 2H), 7.48 (m, 4H). HRMS (Calcd. for M+H C<sub>19</sub>H<sub>15</sub>NOP): 304.0883. Found: 304.0886.

**g. Benzo[d][1,3]dioxol-5-ylidiphenylphosphine oxide.**<sup>5</sup> <sup>31</sup>P{<sup>1</sup>H} (202.5 MHz, CDCl<sub>3</sub>):  $\delta$  29.7. <sup>1</sup>H NMR (500 MHz, CDCl<sub>3</sub>):  $\delta$  7.66-7.62 (m, 4H), 7.53 (t,  $J = 7.5$  Hz, 2H), 7.46-7.43 (m, 4H), 7.16 (m, 1H), 7.05 (d,  $J = 11$  Hz, 1H), 6.86 (m, 1H), 6.00 (s, 2H). HRMS (Calcd. for M+H C<sub>19</sub>H<sub>16</sub>O<sub>3</sub>P): 323.0832. Found: 323.0837.

**h. (2-(diphenylphosphoryl)phenyl)methanol.**<sup>6</sup> <sup>31</sup>P{<sup>1</sup>H} (202.5 MHz, CDCl<sub>3</sub>):  $\delta$  35.0. <sup>1</sup>H NMR (500 MHz, CDCl<sub>3</sub>):  $\delta$  7.64-7.46 (m, 13H), 7.03 (m, 1H), 4.59 (s, 2H). HRMS (Calcd. for M+Na C<sub>19</sub>H<sub>17</sub>O<sub>2</sub>PNa): 331.0864. Found: 331.0852.

**i. Naphthalen-2-ylidiphenylphosphine oxide.**<sup>7</sup> <sup>31</sup>P{<sup>1</sup>H} (202.5 MHz, CDCl<sub>3</sub>):  $\delta$  32.3. <sup>1</sup>H NMR (500 MHz, CDCl<sub>3</sub>):  $\delta$  8.59 (d,  $J = 8.5$  Hz, 1H), 8.01 (d,  $J = 8.5$  Hz, 1H), 7.89 (d,  $J = 8.0$  Hz, 1H), 7.71-7.67 (m, 4H), 7.56-7.28 (m, 10H). HRMS (Calcd. for M+H C<sub>22</sub>H<sub>18</sub>OP): 329.1090. Found: 329.1084.

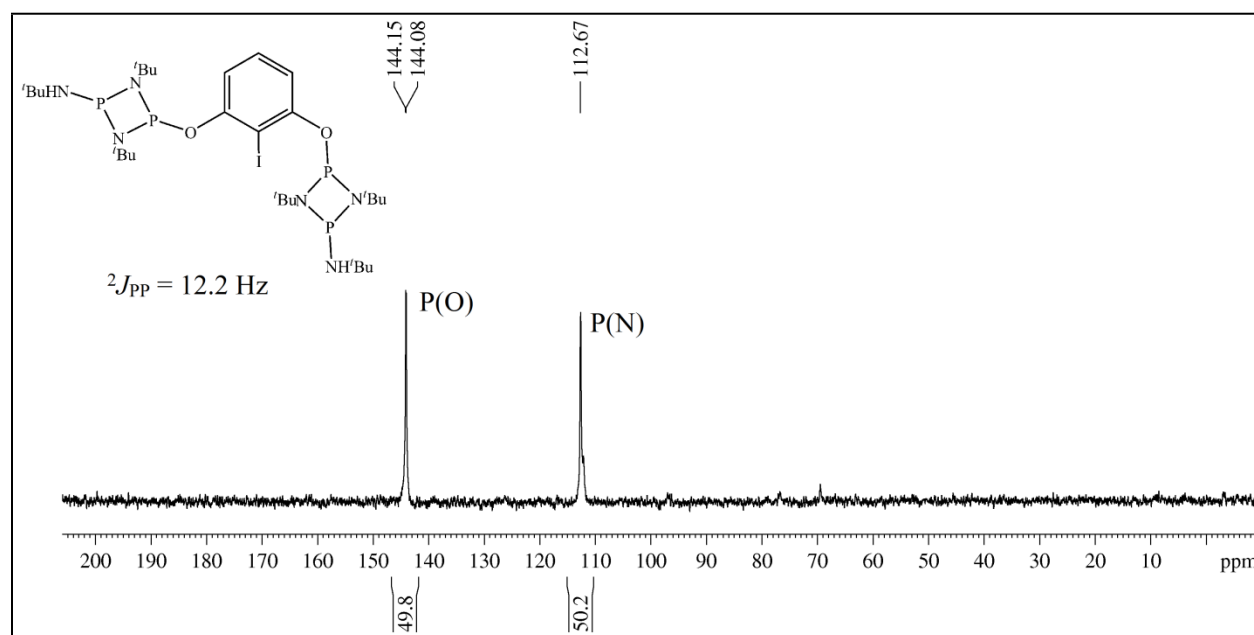

**Figure S1.** <sup>31</sup>P{<sup>1</sup>H} NMR spectrum of **1**

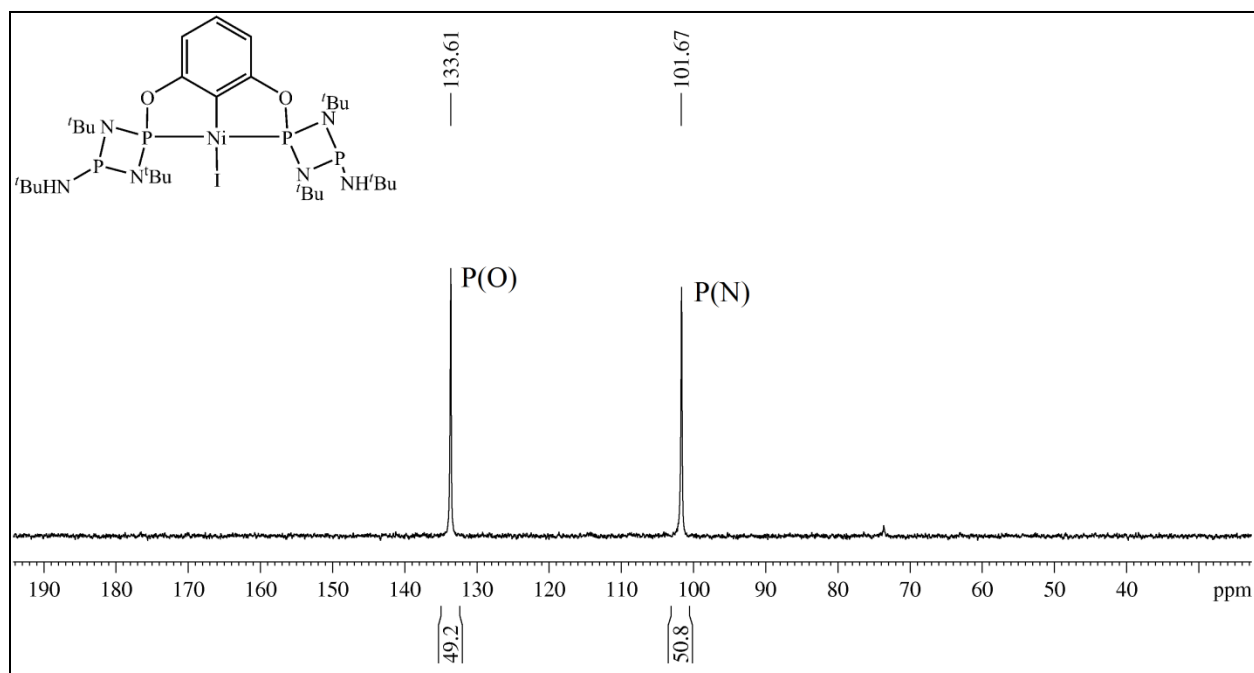

**Figure S2.**  $^{31}\text{P}\{^1\text{H}\}$  NMR spectrum of **2**

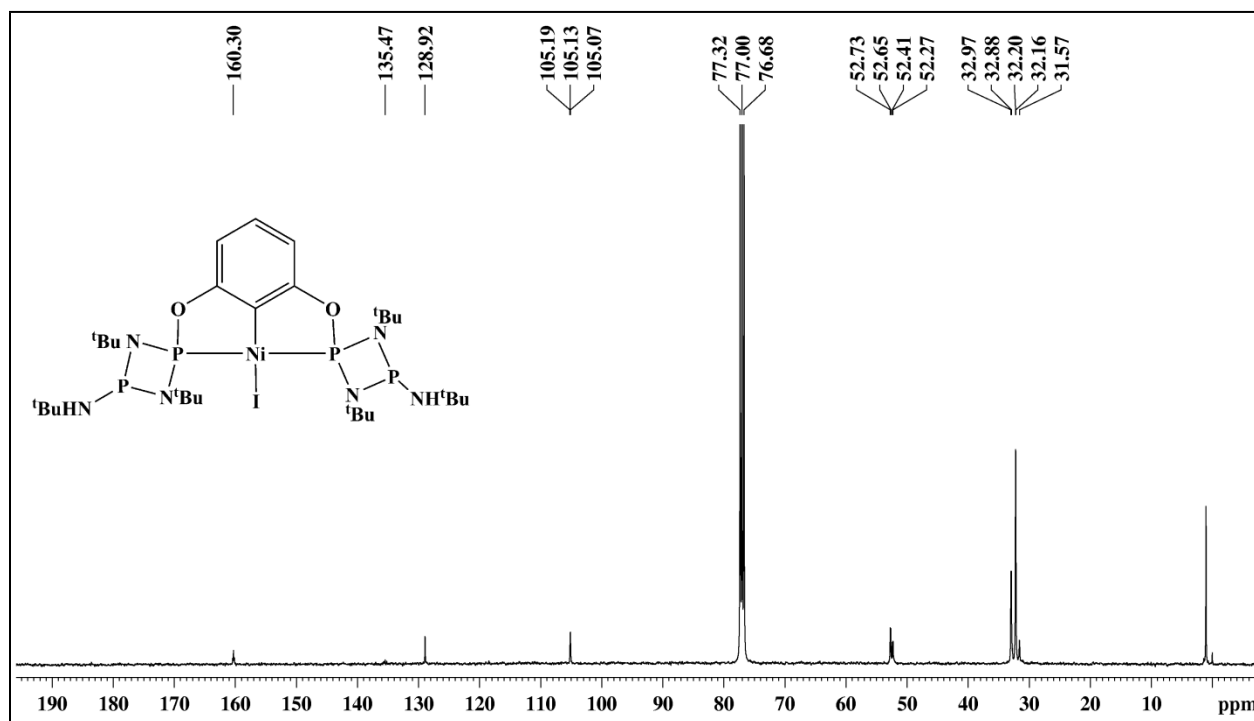

**Figure S3.**  $^{13}\text{C}\{^1\text{H}\}$  NMR spectrum of **2**

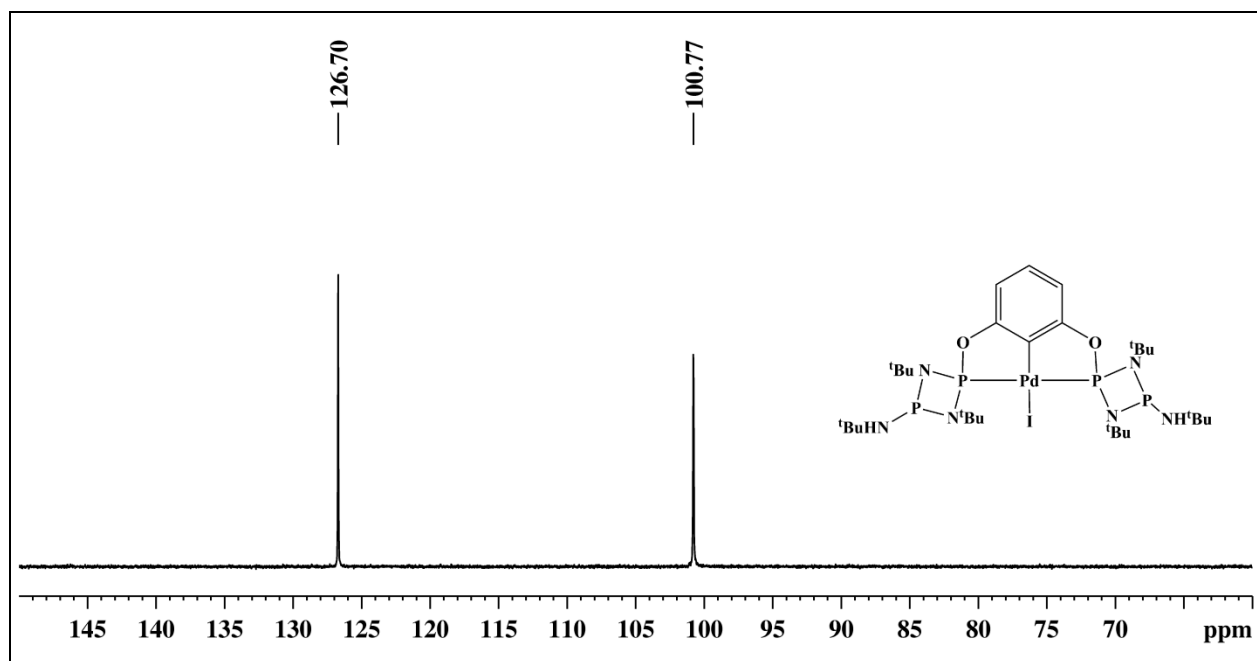

**Figure S4.**  $^{13}\text{P}\{^1\text{H}\}$  NMR spectrum of **3**

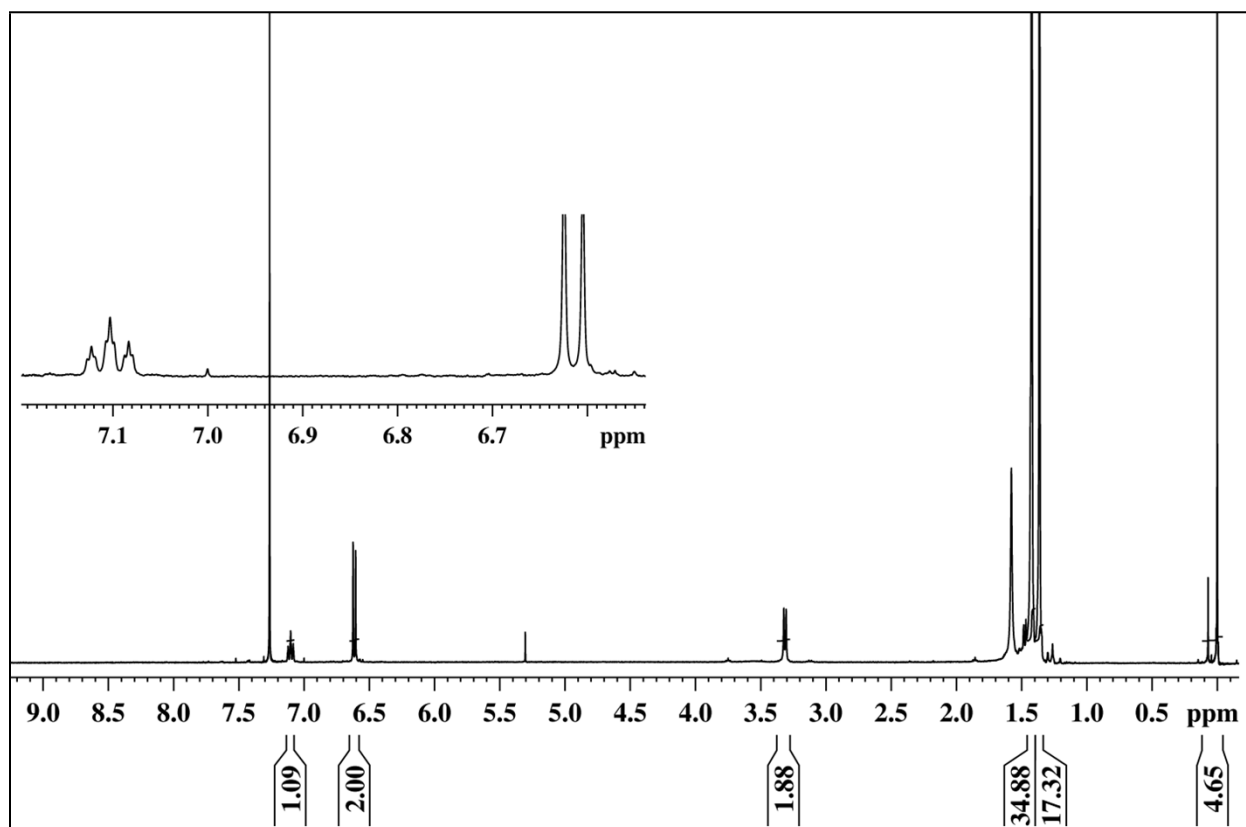

**Figure S5.** Partial  $^1\text{H}$  NMR spectrum of **3**

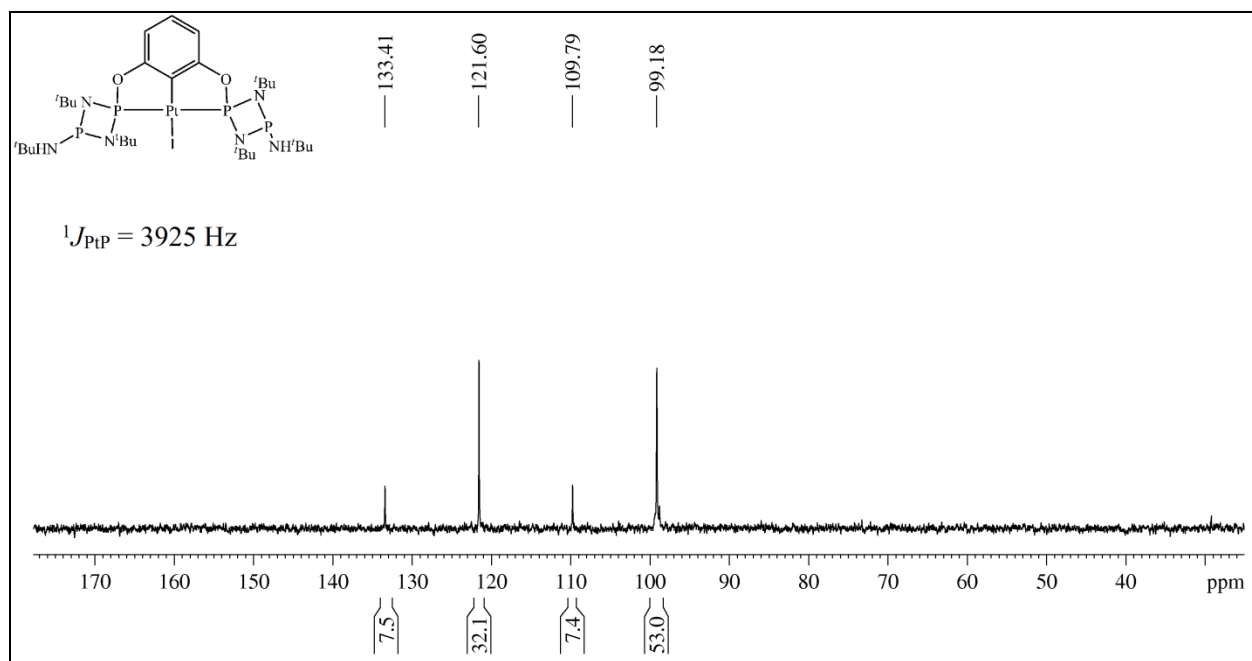

**Figure S6.**  $^{13}\text{P}\{^1\text{H}\}$  NMR spectrum of **4**

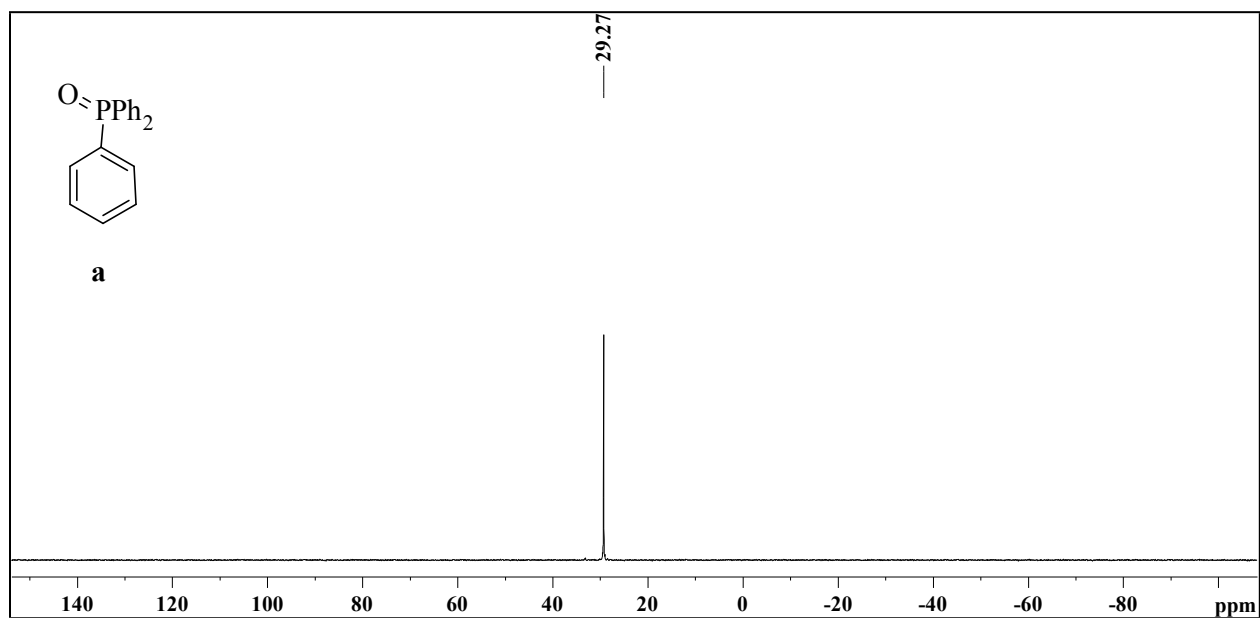

**Figure S7.**  $^{31}\text{P}\{^1\text{H}\}$  NMR spectrum of **a**

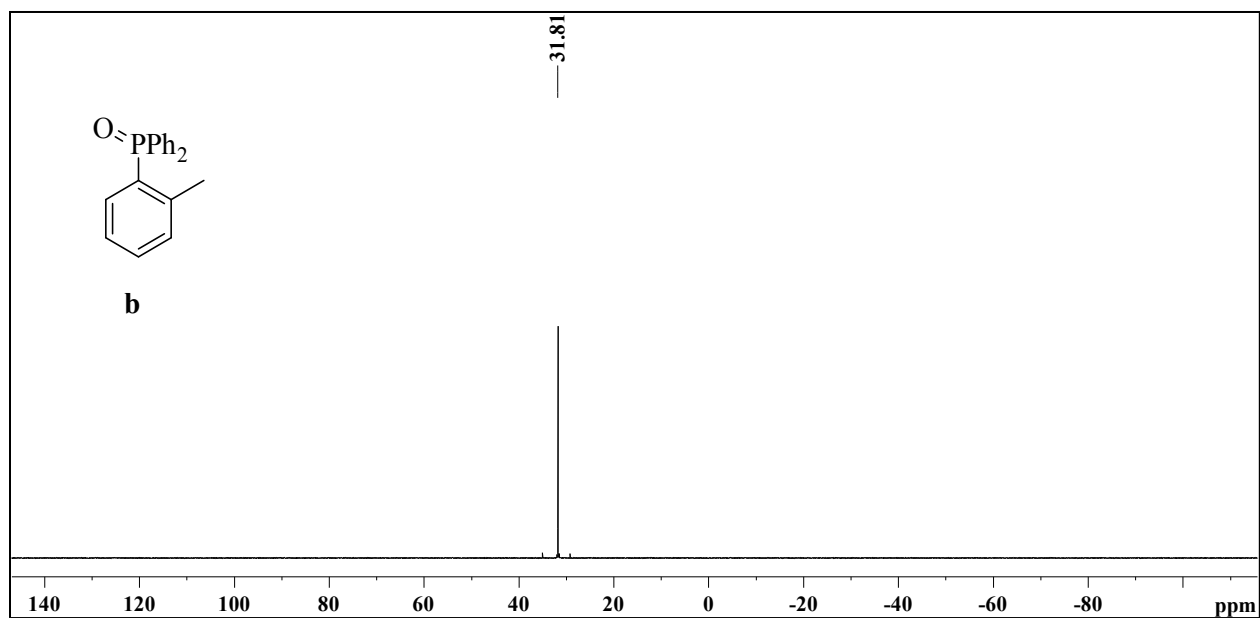

**Figure S8.**  $^{31}\text{P}\{^1\text{H}\}$  NMR spectrum of **b**

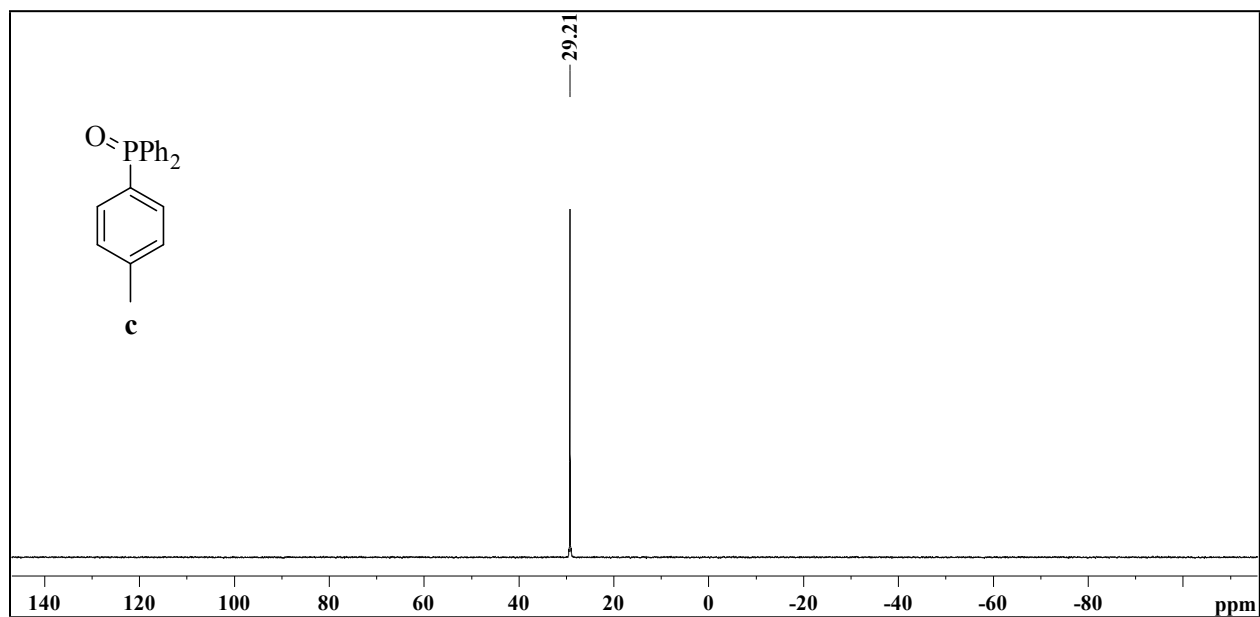

**Figure S9.**  $^{31}\text{P}\{^1\text{H}\}$  NMR spectrum of **c**

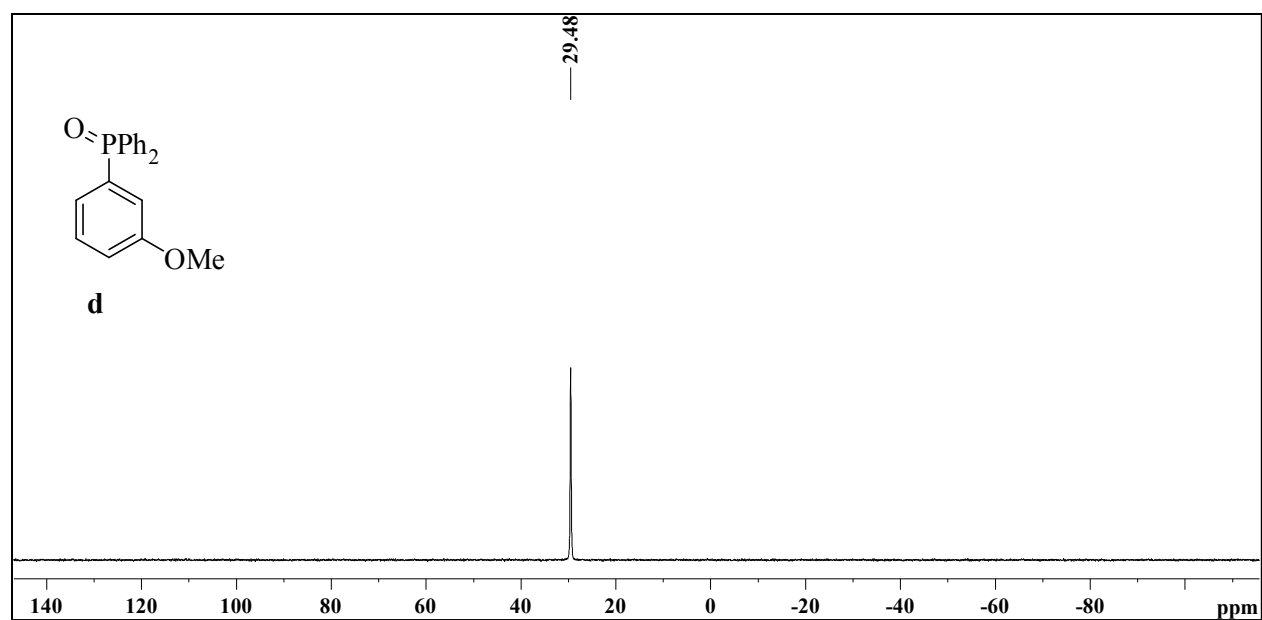

**Figure S10.** <sup>31</sup>P{<sup>1</sup>H} NMR spectrum of **d**

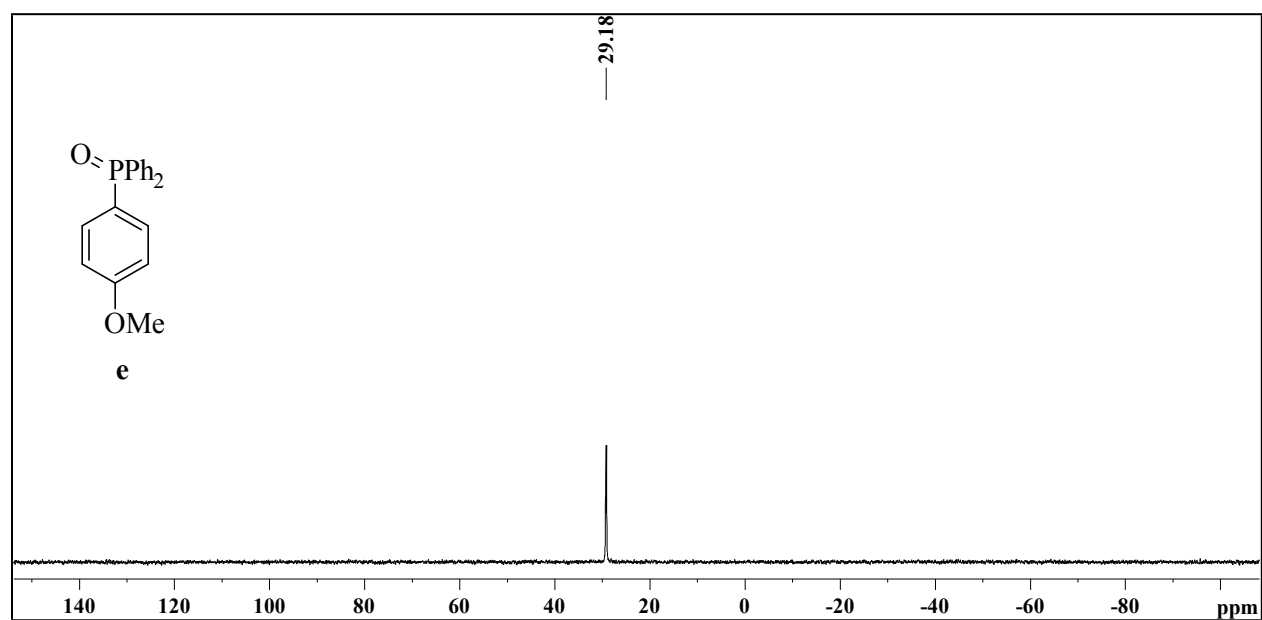

**Figure S11.** <sup>31</sup>P{<sup>1</sup>H} NMR spectrum of **e**



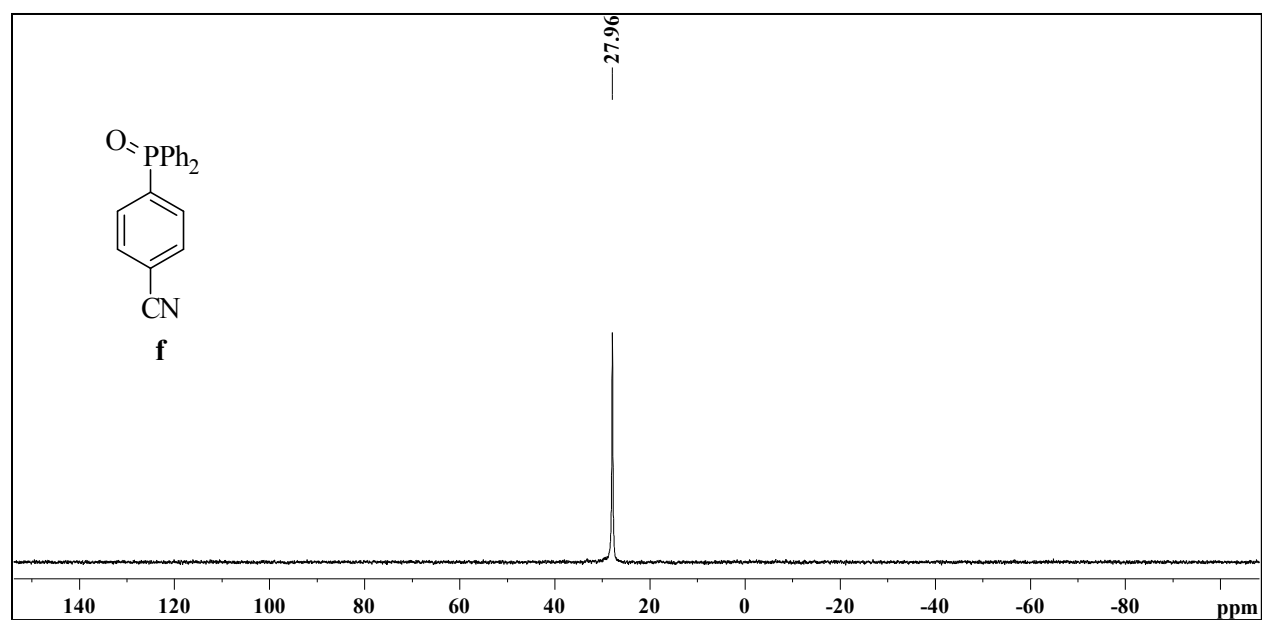

**Figure S12.** <sup>31</sup>P{<sup>1</sup>H} NMR spectrum of **f**

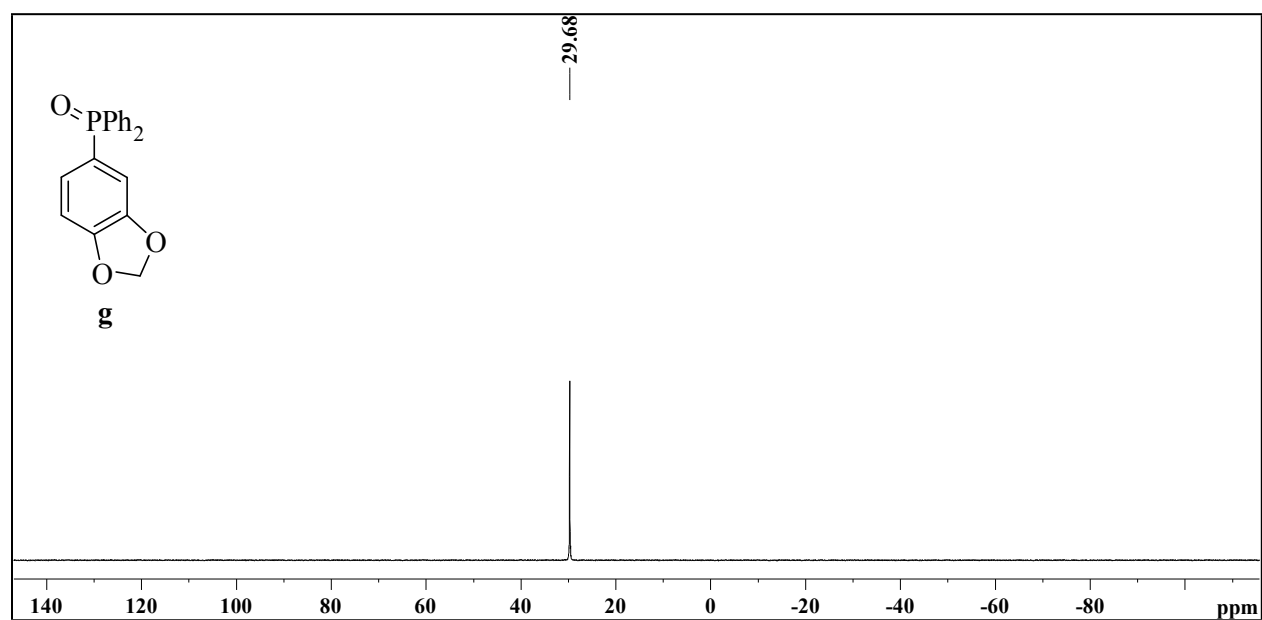

**Figure S13.** <sup>31</sup>P{<sup>1</sup>H} NMR spectrum of **g**

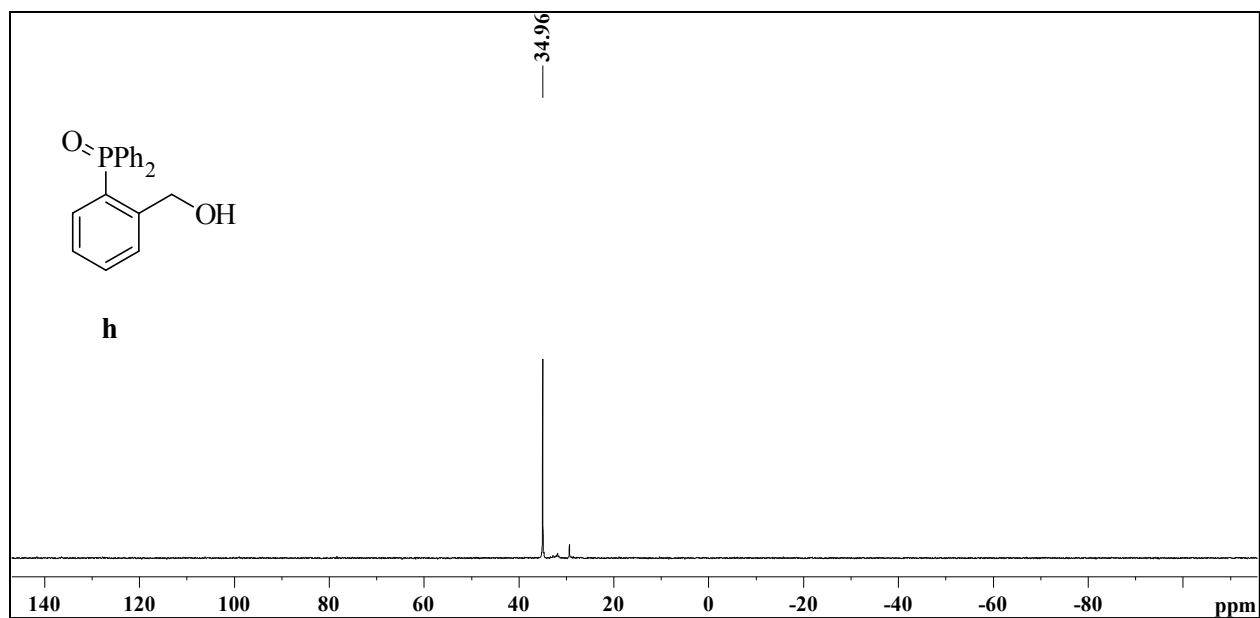

**Figure S14.** <sup>31</sup>P{<sup>1</sup>H} NMR spectrum of **h**

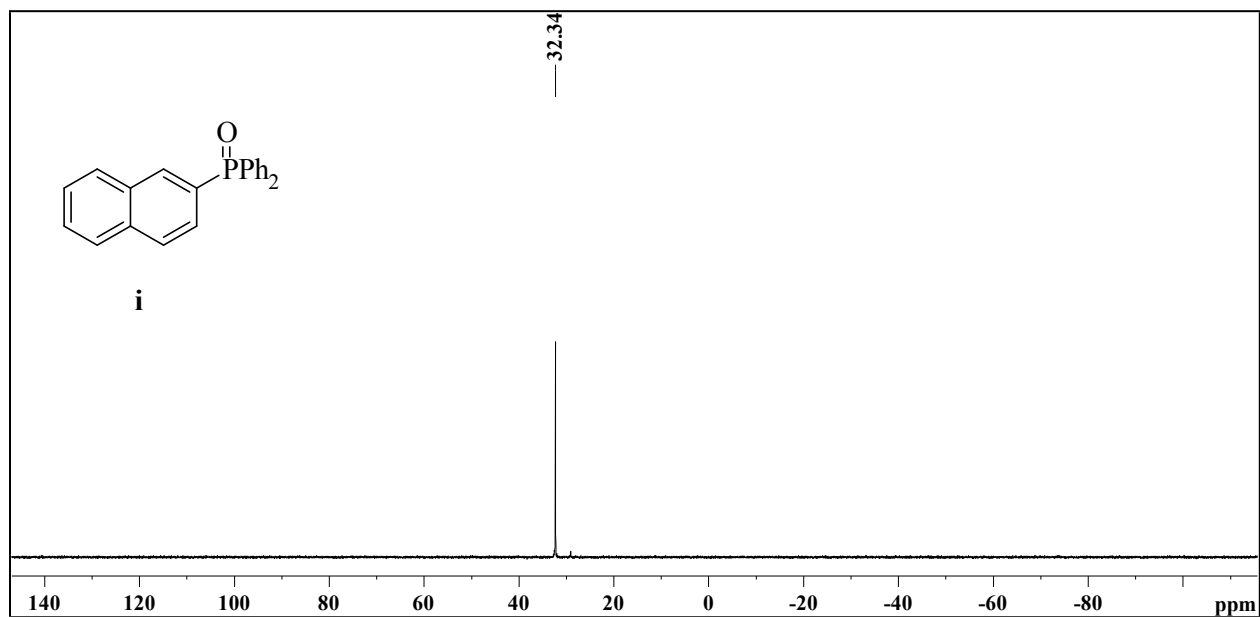

**Figure S15.** <sup>31</sup>P{<sup>1</sup>H} NMR spectrum of **i**

## References

1. T. Wang, S. Sang, L. Liu, H. Qiao, Y. Gao and Y. Zhao, *J. Org. Chem.*, 2014, **79**, 608-617.
2. C. Huang, X. Tang, H. Fu, Y. Jiang and Y. Zhao, *J. Org. Chem.*, 2006, **71**, 5020-5022.
3. R. A. Dhokale and S. B. Mhaske, *Org. Lett.*, 2013, **15**, 2218-2221.
4. O. Berger, C. Petit, E. L. Deal and J.-L. Montchamp, *Adv. Synth. Catal.*, 2013, **355**, 1361-1373.
5. G. Hu, W. Chen, T. Fu, Z. Peng, H. Qiao, Y. Gao and Y. Zhao, *Org. Lett.*, 2013, **15**, 5362-5365.
6. K. Tani, M. Yabuta, S. Nakamura and T. Yamagata, *J. Chem. Soc., Dalton Trans.*, 1993, 2781-2789.
7. C. Shen, G. Yang and W. Zhang, *Org. Biomol. Chem.*, 2012, **10**, 3500-3505.
